# Supplementary material
Source: PubMed Central journal article supplement (PMC2670906)
Supplement: supp_180_9_936__3.pdf [file supp_180_9_936__3.pdf]

### Appendix 3: Key elements of the included studies

| Source                            | Setting                                                    | N                                     | Mean age, years (range) | % women | Study design                                    | Study focus               |
|-----------------------------------|------------------------------------------------------------|---------------------------------------|-------------------------|---------|-------------------------------------------------|---------------------------|
| Valentin et al. <sup>9</sup>      | 205 ICUs, 29 countries                                     | 1913 patients                         | 62 (18–99)              | 39      | Cross-sectional survey                          | Risk factors              |
| Cullen et al. <sup>7</sup>        | 5 ICUs and 6 general care units, 2 tertiary care hospitals | 4031 patients                         | NR                      | NR      | Prospective cohort                              | Risk factors              |
| Sinopoli et al. <sup>10</sup>     | 20 ICUs, USA                                               | 1353 incidents                        | > 65 (44%)              | 43      | Retrospective cohort                            | Risk factors              |
| Calabrese et al. <sup>11</sup>    | 5 ICUs, USA                                                | 851 patients                          | NR                      | NR      | Prospective cohort                              | Risk factors              |
| Tissot et al. <sup>12</sup>       | 1 academic MICU                                            | 26 patients                           | NR                      | NR      | Prospective cohort                              | Risk factors              |
| Rothschild et al. <sup>3</sup>    | 1 MICU and 1 CCU, tertiary care academic hospital          | 391 patients                          | 64                      | 43      | Secondary analysis of a prospective cohort      | Risk factors              |
| Landrigan et al. <sup>13</sup>    | 1 MICU and 1 CCU, tertiary care academic hospital          | 581 patients                          | 64                      | 46      | Randomized controlled trial                     | Physician work schedule   |
| Shulman et al. <sup>14</sup>      | General ICU, UK                                            | 387 drug charts<br>3465 prescriptions | NR                      | NR      | Before and after                                | CPOE                      |
| Colpaert et al. <sup>15</sup>     | 1 SICU, Belgium                                            | 90 patients<br>2510 prescriptions     | 58 (37–71)              | NR      | Cross-sectional survey with concurrent controls | CPOE                      |
| Weant et al. <sup>16</sup>        | Neurosurgical ICU                                          | 88 medication errors                  | NR                      | NR      | Before and after                                | CPOE                      |
| Evans et al. <sup>17</sup>        | 1 MICU, USA                                                | 1681 patients                         | 47                      | 41      | Before and after                                | CDSS                      |
| Rothschild et al. <sup>18</sup>   | 2 CSICU and 2 step-down units                              | 800 patients                          | 67                      | 34      | Prospective time series                         | Smart pumps               |
| Nuckols et al. <sup>19</sup>      | SICUs and MICUs, 2 hospitals, USA                          | 4604 patients                         | NR                      | NR      | Before and after                                | Smart pumps               |
| Leape et al. <sup>20</sup>        | 1 MICU and 1 CCU, tertiary academic hospital               | 275 patients                          | NR                      | NR      | Before and after with non-equivalent control    | Pharmacists in the ICU    |
| Pronovost et al. <sup>21</sup>    | 1 SICU, USA                                                | NR                                    | NR                      | NR      | Before and after                                | Medication reconciliation |
| Wasserfallen et al. <sup>22</sup> | 1 MICU and 1 SICU, academic hospital, Switzerland          | 434 patients                          | NR                      | NR      | Before and after with non-equivalent control    | Standardization           |
| McMullin et al. <sup>23</sup>     | 1 multisystem ICU, Canada                                  | 430 patients                          | 66                      | 42      | Prospective longitudinal intervention study     | Standardization           |

Note: CCU = critical care unit, CDSS = clinical decision support system, CPOE = computerized physician order entry, CSICU = cardiac surgical intensive care unit, ICU = intensive care unit, MICU = medical intensive care unit, NR = none reported, SICU = surgical intensive care unit, UK = United Kingdom, USA = United States of America.

### Appendix 3b: Summary of Included Studies

| Source (con't)             | Recruitment Method & Sampling/Data Sources                                                                         | Allocation                                          | Blinding                                        | Attrition of Participants                               | Outcomes                                                                                                                                    | Statistical Analyses                                                                                  |
|----------------------------|--------------------------------------------------------------------------------------------------------------------|-----------------------------------------------------|-------------------------------------------------|---------------------------------------------------------|---------------------------------------------------------------------------------------------------------------------------------------------|-------------------------------------------------------------------------------------------------------|
| Valentin et al. 2006 (9)   | All patients staying in participating ICUs during 24 hour study period                                             | N/A                                                 | None                                            | Sampling frame not reported                             | Questionnaire of select sentinel events                                                                                                     | Multivariable logistic regression                                                                     |
| Cullen et al. 1997 (7)     | ADEs screened for six months by direct reporting, soliciting information from health care workers and chart review | N/A                                                 | None                                            | NR                                                      | Two physicians independently evaluated all potential ADEs clinically (important, serious, life threatening)                                 | Univariable & multivariable linear regression analyses                                                |
| Sinopoli et al. 2007 (10)  | Safety reports from voluntary, anonymous, Web-based ICU Safety Reporting System (ICUSRS)                           | N/A                                                 | None                                            | 229 reports excluded due to missing data or duplication | Voluntary incident reports (ranging from family dissatisfaction to death)                                                                   | Chi-square test, multivariable logistic regression                                                    |
| Calabrese et al. 2001(11)  | Pharmacist selection of admitted non-consecutive weekday patients during 3 month period                            | N/A                                                 | None                                            | NR                                                      | Pharmacist observation of medication errors (no harm, harm, death)                                                                          | Medication error counts & proportions                                                                 |
| Tissot et al. 1999 (12)    | 2 nurses randomly selected daily for observation                                                                   | N/A                                                 | None                                            | NR                                                      | Pharmacist observation of medication preparation and administration errors (minor, significant, life-threatening, fatal)                    | Medication error counts & proportions                                                                 |
| Rothchild et al 2005(3)    | Consecutive admitted patients followed until transfer, unit discharge or death                                     | N/A                                                 | Suspected errors & AEs rated by two blinded MDs | NR                                                      | Direct continuous observation of on-call intern & chart review for errors & AE (severity & preventability rated)                            | Fisher's exact test, Wilcoxon rank-sum test, Student's t-test                                         |
| Landrigan et al. 2004 (13) | Consecutive admitted patients followed until transfer, unit discharge or death                                     | Interns randomised to one of two work schedules     | Suspected errors & AEs rated by two blinded MDs | NR                                                      | Direct continuous observation of on-call intern & chart review for errors (intercepted, nonintercepted) & AEs (preventable, nonpreventable) | Fisher exact test, Wilcoxon rank-sum test, Student's t-test                                           |
| Shulman et al. 2005 (19)   | 9 days observation during hand-written prescribing & 17 days during CPOE                                           | CPOE implemented during study period                | None                                            | NR                                                      | Prospective recording of errors by pharmacist (minor, moderate, major)                                                                      | Chi-squared test for trend, Student's t-test                                                          |
| Colpaert et al. 2006 (20)  | Consecutive admitted patients to 3 units of a SICU over a 5 week period                                            | 2 paper-based units & 1 CPOE based unit within SICU | Panel blinded to patient & prescribing method   | NR                                                      | SICU pharmacist reviewed all prescriptions for error & independent panel evaluated severity (minor, intercepted, serious)                   | Kruskal-Wallis, Mann-Whitney U test, Fisher's exact test, Chi-squared test, Spearman rank correlation |
| Weant et al 2007 (21)      | Consecutive medication errors reported for 1 year before and 1 year after CPOE implementation                      | CPOE implemented during study                       | None                                            | NR                                                      | Voluntary reporting of medication errors using online reporting system – clinical consequences                                              | Paired Student's t test                                                                               |

|                               |                                                                                                                                             |                                                                                                   |                                                                   |                                                 |                                                                                                                                                 |                                                                                                    |
|-------------------------------|---------------------------------------------------------------------------------------------------------------------------------------------|---------------------------------------------------------------------------------------------------|-------------------------------------------------------------------|-------------------------------------------------|-------------------------------------------------------------------------------------------------------------------------------------------------|----------------------------------------------------------------------------------------------------|
|                               |                                                                                                                                             | period                                                                                            |                                                                   |                                                 | not reported                                                                                                                                    |                                                                                                    |
| Evans et al. 1998 (25)        | Consecutive admitted patients over a 3 year period (2 year period before CDSS & 1 year period after)                                        | CDSS implemented during study period                                                              | None                                                              | NR                                              | Prospective surveillance for ADEs (severity not reported)                                                                                       | Chi-square test, Mann-Whitney U test, Fisher's exact test, multivariable linear regression         |
| Rothschild et al. 2005 (27)   | Consecutive admitted patients followed during four 8-week pump periods                                                                      | Study periods 1 & 3 - decision support on<br>Study periods 2 & 4 - decision support off           | None                                                              | 56 admissions excluded due to missing data logs | Pump software logs, medical record review, two physician review of AEs (preventable vs. nonpreventable; intercepted vs. nonintercepted).        | Chi square test, Fisher's exact test, Wilcoxon rank-sum test, Student's t-test, Poisson regression |
| Nuckols et al. 2007 (28)      | Examined 20,000 bed-days of care                                                                                                            | Conventional pump study period & smart-pump study period                                          | None                                                              | NR                                              | ADEs (preventability) abstracted from medical records by study nurses & rated by two physicians                                                 | Poisson regression                                                                                 |
| Leape et al. 1999 (29)        | Patients randomly sampled from four groups; 75 patients before & after intervention, 50 control patients before & 75 control patients after | Random number generator to sample patients before & after pharmacist participation in ICU         | Physician reviewers & investigators blinded to patient assignment | NR                                              | ADEs abstracted from medical records by nurse & pharmacist, rated by two blinded physicians for severity and preventability                     | Unpaired t test                                                                                    |
| Pronovost et al 2003 (31)     | Audit of approximately 10% of patient discharges from ICU per week for 11 months                                                            | Medication reconciliation tool                                                                    | None                                                              | NR                                              | Medical record audits for medication errors in the discharge orders – clinical consequences not recorded                                        | Medication error counts & proportions                                                              |
| Wasserfallen et al. 2004 (32) | Patients hospitalized for >24 hours in the study ICUs & prescribed antibiotics during 2 study periods totaling 5 months                     | Standardized order sheet implemented in the SICU during study period                              | None                                                              | NR                                              | Study pharmacist reviewed antibiotic prescriptions according to American Society of Hospital Pharmacists' criteria for safety (safe vs. unsafe) | Chi-square test                                                                                    |
| McMullin et al. 2006 (33)     | Consecutive ICU patients $\geq$ 18 years of age who were admitted for >48 hours                                                             | Baseline usual practice period; 5 behavior change strategies period; follow up observation period | Practicing clinicians blinded to study                            | NR                                              | Research coordinators abstracted medical record for VTE prophylaxis and VTE                                                                     | Kruskal-Wallis test, Chi-square test, multiple variable logistic regression                        |

Note: ICU; intensive care unit, NR; none reported, N/A; not applicable, MICU; medical intensive care unit, CCU; coronary care unit, SICU; surgical intensive care unit, CPOE; Computerized Physician Order Entry, CDSS; Clinical Decision Support Systems, ADE; adverse drug event, CSICU; cardiac surgery intensive care unit, VTE; venous thromboembolism
