# Supplementary material
Source: PubMed Central journal article supplement (PMC2670906)

**Appendix 2:** Article selection process

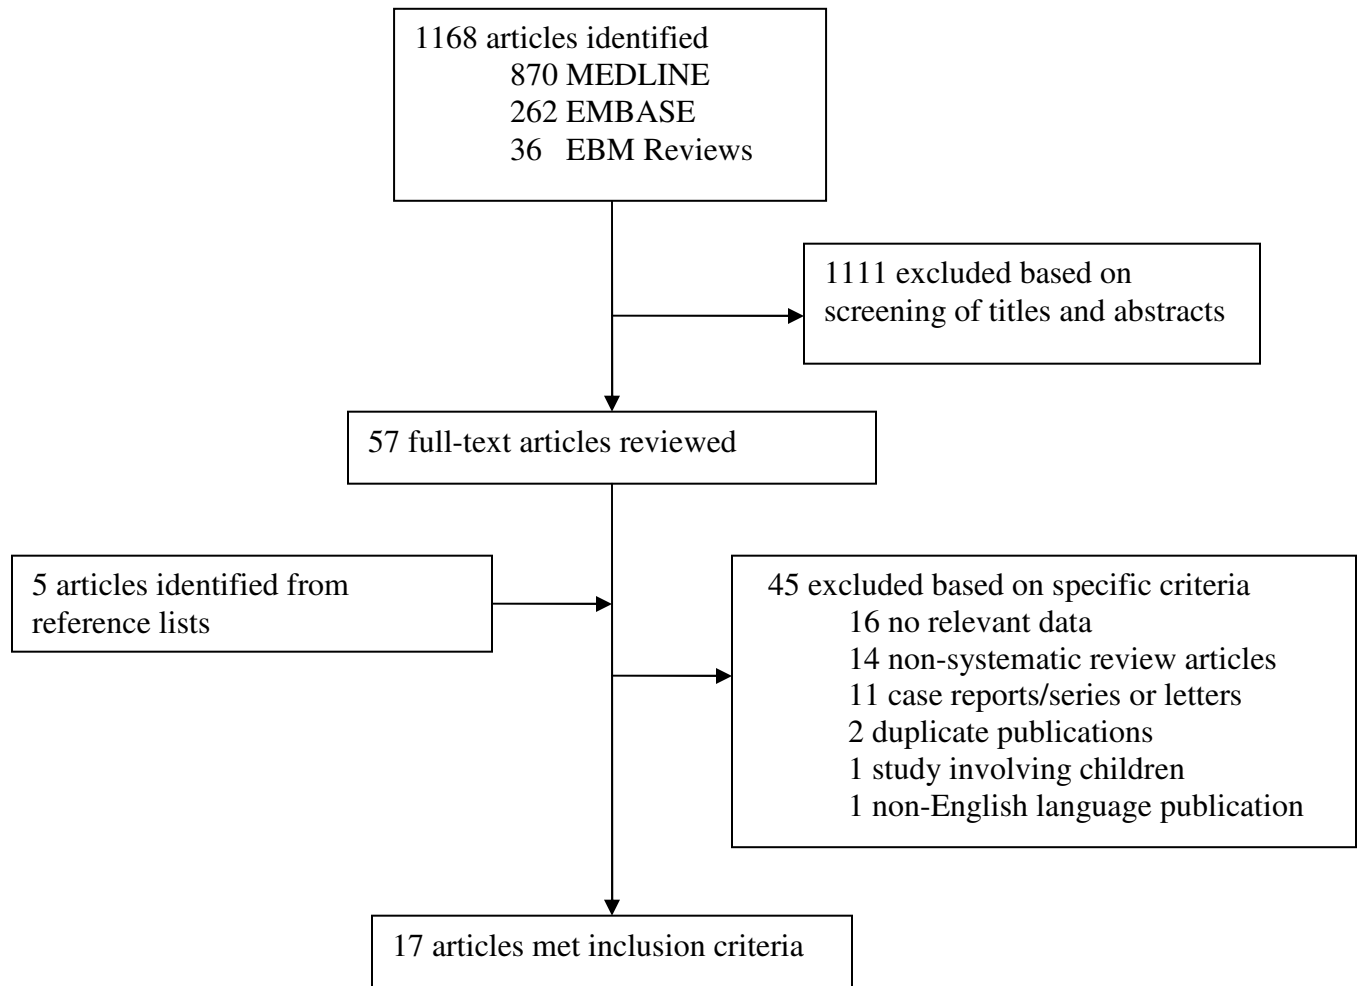

Supplement: supp_180_9_936__2.pdf [file supp_180_9_936__2.pdf]
